# Supplementary material
Source: PubMed Central journal article supplement (PMC3617953)
Supplement: supp_M033985_jlr.M033985-2.pdf [file supp_M033985_jlr.M033985-2.pdf]

**Supplementary Table 1. Effect of inhibition of SMS1 by D609 treatment on lipid levels.** Reported are the levels of individual species of ceramide (**A**), DAG (**B**) and SM (**C**) as measured by mass spectrometry during treatment with D609 (50  $\mu\text{g/ml}$ ) after 24 and 48 hours. Since basal levels of lipids were variable among the different experiments whereas the pattern of changes between experimental conditions was similar (Figure 4A and B), reported are the absolute values of one representative experiment. In bold are the values that were significantly different compared to the time-matched control once the fold change versus the appropriate control was calculated among three independent experiments ( $p < 0.05$  versus CT). CT: Control cells.

**A Ceramide species (pmoles/nmole of Pi)**

| Samples  | C14-Cer      | C16-Cer      | C18-Cer      | C18:1-Cer    | C20-Cer      | C20:1-Cer    | C22-Cer      | C22:1-Cer    | C24-Cer     | C24:1-Cer    | C26-Cer      | C26:1-Cer    | Tot Cer     |
|----------|--------------|--------------|--------------|--------------|--------------|--------------|--------------|--------------|-------------|--------------|--------------|--------------|-------------|
| CT 24h   | 0.018        | 0.117        | 0.020        | 0.007        | 0.014        | 0.003        | 0.082        | 0.030        | 1.13        | 0.445        | 0.015        | 0.035        | 1.92        |
| D609 24h | <b>0.097</b> | <b>0.323</b> | <b>0.073</b> | <b>0.025</b> | <b>0.082</b> | 0.008        | <b>0.213</b> | <b>0.073</b> | 1.15        | 0.502        | <b>0.042</b> | <b>0.053</b> | 2.64        |
| CT 48h   | 0.012        | 0.063        | 0.012        | 0.003        | 0.010        | 0.002        | 0.047        | 0.018        | 0.73        | 0.300        | 0.013        | 0.015        | 1.23        |
| D609 48h | <b>0.093</b> | <b>0.277</b> | <b>0.053</b> | <b>0.020</b> | <b>0.080</b> | <b>0.012</b> | <b>0.158</b> | <b>0.082</b> | <b>0.90</b> | <b>0.420</b> | <b>0.020</b> | <b>0.023</b> | <b>2.14</b> |

**B DAG species (pmoles/nmole of Pi)**

| Samples  | C14:0/16:0-DAG | C14:0/18:0-DAG | C14:0/18:1-DAG | C16:0/18:0-DAG | C16:0/18:1-DAG | C16:0/20:0-DAG | C16:0/24:1-DAG | C16:1/18:0-DAG | C16:1/18:1-DAG |
|----------|----------------|----------------|----------------|----------------|----------------|----------------|----------------|----------------|----------------|
| CT 24h   | 0.620          | 0.225          | 0.127          | 3.82           | 5.39           | 0.182          | 0.217          | 0.072          | 0.393          |
| D609 24h | <b>0.177</b>   | <b>0.050</b>   | 0.080          | <b>0.84</b>    | <b>1.32</b>    | <b>0.005</b>   | <b>0.008</b>   | 0.115          | 0.602          |
| CT 48h   | 0.497          | 0.298          | 0.142          | 3.59           | 3.14           | 0.275          | 0.267          | 0.022          | 0.285          |
| D609 48h | <b>0.068</b>   | <b>0.050</b>   | 0.075          | <b>0.69</b>    | <b>0.78</b>    | <b>0.020</b>   | <b>0.020</b>   | 0.003          | 0.237          |

**B continued DAG species (pmoles/nmole of Pi)**

| Samples  | C18:0/18:1-DAG | C18:0/18:2-DAG | C18:0/20:4-DAG | Di-C14:0-DAG | Di-C16:0-DAG | Di-C18:0-DAG | Di-C18:1-DAG | Total DAG   |
|----------|----------------|----------------|----------------|--------------|--------------|--------------|--------------|-------------|
| CT 24h   | 0.92           | 0.28           | 1.08           | 0.080        | 2.54         | 0.207        | 0.121        | 16.27       |
| D609 24h | <b>0.65</b>    | 0.48           | <b>0.66</b>    | 0.060        | <b>0.45</b>  | 0.178        | <b>0.225</b> | <b>5.89</b> |
| CT 48h   | 2.05           | 0.16           | 0.58           | 0.068        | 2.01         | 0.093        | 0.288        | 13.77       |
| D609 48h | <b>0.61</b>    | 0.14           | 0.90           | <b>0.022</b> | <b>0.23</b>  | 0.197        | <b>0.195</b> | <b>4.24</b> |

**C****SM species (pmoles/nmole of Pi)**

| <b>Samples</b> | <b>C14-SM</b> | <b>C16-SM</b> | <b>C18-SM</b> | <b>C18:1-SM</b> | <b>C20-SM</b> | <b>C20:1-SM</b> | <b>C22-SM</b> | <b>C22:1-SM</b> | <b>C24-SM</b> | <b>C24:1-SM</b> | <b>C26-SM</b> | <b>C26:1-SM</b> | <b>Tot SM</b> |
|----------------|---------------|---------------|---------------|-----------------|---------------|-----------------|---------------|-----------------|---------------|-----------------|---------------|-----------------|---------------|
| CT 24h         | 0.505         | 21.25         | 3.16          | 2.23            | 1.07          | 0.28            | 6.67          | 2.86            | 7.59          | 16.59           | 0.09          | 0.37            | 62.67         |
| D609 24h       | <b>0.735</b>  | 22.23         | 2.71          | <b>1.62</b>     | 0.98          | 0.22            | 3.93          | 1.80            | 4.56          | 8.37            | <b>0.25</b>   | <b>0.41</b>     | 47.82         |
| CT 48h         | 0.725         | 27.02         | 3.31          | 3.09            | 0.81          | 0.14            | 7.14          | 2.40            | 7.68          | 17.01           | 0.07          | 0.20            | 69.60         |
| D609 48h       | 0.885         | 23.19         | 2.97          | 2.85            | 0.87          | 0.13            | 7.67          | 2.44            | 9.41          | 16.80           | 0.28          | 0.40            | 67.90         |

**Supplementary Table 2. Effect of inhibition of *SMS1* by siRNA treatment on lipid levels.** Reported are the levels of individual species of ceramide (**A**), DAG (**B**) and SM (**C**) as measured by mass spectrometry during down-regulation of *SMS1* (SMS1-) with siRNA as compared to a scrambled control sequence (SCR) after 24 and 48 hours. Since basal levels of lipids were variable among the different experiments whereas the pattern of changes between experimental conditions was similar (Figure 4C and D), reported are the absolute values of one representative experiment. In bold are the values that were significantly different compared to the time-matched control once the fold change versus the appropriate control was calculated among three independent experiments ( $p < 0.05$  versus SCR).

**A**

**Ceramide species (pmoles/nmole of Pi)**

| Samples   | C14-Cer      | C16-Cer      | C18-Cer      | C18:1-Cer | C20-Cer      | C20:1-Cer | C22-Cer | C22:1-Cer    | C24-Cer      | C24:1-Cer | C26-Cer | C26:1-Cer    | Tot Cer     |
|-----------|--------------|--------------|--------------|-----------|--------------|-----------|---------|--------------|--------------|-----------|---------|--------------|-------------|
| SCR 24h   | 0.008        | 0.140        | 0.155        | 0.012     | 0.021        | 0.001     | 0.072   | 0.042        | 1.137        | 0.907     | 0.038   | 0.026        | 2.56        |
| SMS1- 24h | <b>0.001</b> | <b>0.118</b> | 0.160        | 0.004     | <b>0.014</b> | 0.001     | 0.070   | 0.039        | <b>0.802</b> | 0.904     | 0.015   | <b>0.021</b> | 2.15        |
| SCR 48h   | 0.036        | 0.307        | 0.124        | 0.021     | 0.026        | 0.004     | 0.112   | 0.069        | 1.532        | 1.427     | 0.053   | 0.067        | 3.77        |
| SMS1- 48h | 0.044        | <b>0.463</b> | <b>0.204</b> | 0.046     | <b>0.065</b> | 0.011     | 0.127   | <b>0.105</b> | 1.246        | 1.555     | 0.029   | 0.053        | <b>3.95</b> |

**B**

**DAG species (pmoles/nmole of Pi)**

| Samples   | C14:0/16:0-DAG | C14:0/18:0-DAG | C14:0/18:1-DAG | C16:0/18:0-DAG | C16:0/18:1-DAG | C16:0/20:0-DAG | C16:0/24:1-DAG | C16:1/18:0-DAG | C16:1/18:1-DAG |
|-----------|----------------|----------------|----------------|----------------|----------------|----------------|----------------|----------------|----------------|
| SCR 24h   | 0.774          | 0.399          | 0.062          | 7.208          | 2.132          | 0.288          | 0.090          | 0.087          | 0.060          |
| SMS1- 24h | <b>0.559</b>   | <b>0.146</b>   | <b>0.036</b>   | <b>3.172</b>   | <b>1.695</b>   | <b>0.095</b>   | 0.077          | <b>0.051</b>   | <b>0.045</b>   |
| SCR 48h   | 0.277          | 0.122          | 0.053          | 2.908          | 1.766          | 0.105          | 0.061          | 0.060          | 0.048          |
| SMS1- 48h | <b>0.178</b>   | <b>0.062</b>   | 0.037          | <b>1.856</b>   | 1.499          | 0.080          | 0.058          | <b>0.044</b>   | 0.052          |

**B continued**

**DAG species (pmoles/nmole of Pi)**

| Samples   | C18:0/18:1-DAG | C18:0/18:2-DAG | C18:0/20:4-DAG | Di-C14:0-DAG | Di-C16:0-DAG | Di-C18:0-DAG | Di-C18:1-DAG | Total DAG   |
|-----------|----------------|----------------|----------------|--------------|--------------|--------------|--------------|-------------|
| SCR 24h   | 1.102          | 0.034          | 0.072          | 0.041        | 2.534        | 0.106        | 0.103        | 15.09       |
| SMS1- 24h | <b>0.567</b>   | <b>0.019</b>   | <b>0.037</b>   | <b>0.028</b> | <b>1.637</b> | 0.028        | 0.086        | <b>8.28</b> |
| SCR 48h   | 1.413          | 0.082          | 0.432          | 0.019        | 0.667        | 0.064        | 0.120        | 8.20        |
| SMS1- 48h | 1.262          | 0.103          | 0.351          | 0.014        | 0.452        | 0.029        | 0.134        | <b>6.21</b> |

**C****SM species (pmoles/nmole of Pi)**

| <b>Samples</b> | <b>C14-SM</b> | <b>C16-SM</b> | <b>C18-SM</b> | <b>C18:1-SM</b> | <b>C20-SM</b> | <b>C20:1-SM</b> | <b>C22-SM</b> | <b>C22:1-SM</b> | <b>C24-SM</b> | <b>C24:1-SM</b> | <b>C26-SM</b> | <b>C26:1-SM</b> | <b>Total SM</b> |
|----------------|---------------|---------------|---------------|-----------------|---------------|-----------------|---------------|-----------------|---------------|-----------------|---------------|-----------------|-----------------|
| SCR 24h        | 1.17          | 22.0          | 2.96          | 0.301           | 0.687         | 0.195           | 2.94          | 1.50            | 3.98          | 8.38            | 0.035         | 0.204           | 44.35           |
| SMS1- 24h      | 1.06          | 19.0          | 2.69          | 0.305           | <b>0.702</b>  | 0.224           | 2.64          | 1.46            | <b>3.04</b>   | 7.39            | 0.042         | 0.174           | 38.73           |
| SCR 48h        | 1.22          | 22.5          | 2.77          | 0.260           | 0.681         | 0.186           | 2.34          | 1.31            | 3.77          | 7.18            | 0.077         | 0.197           | 42.49           |
| SMS1- 48h      | 0.96          | 13.0          | 1.84          | 0.249           | 0.663         | 0.172           | 2.28          | 1.31            | <b>2.86</b>   | 6.21            | 0.027         | <b>0.118</b>    | <b>29.69</b>    |

**Supplementary Table 3. Effect of overexpression of *BCR-ABL* in HL-60 cells on lipid levels.** Reported are the levels of individual species of ceramide (**A**), DAG (**B**), and SM (**C**) extracted from HL-60/neo and HL-60/Bcr-abl cells as measured by mass spectrometry. Cells from each experimental condition were harvested after the same amount of time in culture and during the logarithmic stage of growth. Since basal levels of lipids were variable among the different experiments whereas the pattern of changes between experimental conditions were similar (Figure 5), reported are the absolute values of one representative experiment. In bold are the values that were significantly different compared to the time-matched control once the fold change versus the appropriate control was calculated among two independent experiments ( $p < 0.05$  versus HL-60/neo). BDL: below detection limit.

**A Ceramide species (pmoles/nmole of Pi)**

| Samples       | C14-Cer | C16-Cer | C18-Cer | C18:1-Cer | C20-Cer | C20:1-Cer | C22-Cer     | C22:1-Cer   | C24-Cer     | C24:1-Cer   | C26-Cer | C26:1-Cer   | Total Cer   |
|---------------|---------|---------|---------|-----------|---------|-----------|-------------|-------------|-------------|-------------|---------|-------------|-------------|
| HL-60/neo     | 0.08    | 0.83    | 0.07    | 0.03      | 0.02    | BDL       | 0.08        | 0.02        | 1.81        | 1.39        | 0.07    | 0.16        | 4.56        |
| HL-60/Bcr-abl | 0.09    | 0.97    | 0.10    | 0.05      | 0.04    | 0.01      | <b>0.25</b> | <b>0.10</b> | <b>3.68</b> | <b>3.71</b> | 0.13    | <b>0.28</b> | <b>9.41</b> |

**B DAG species (pmoles/nmole of Pi)**

| Samples       | C14:0/16:0-DAG | C14:0/18:0-DAG | C14:0/18:1-DAG | C16:0/18:0-DAG | C16:0/18:1-DAG | C16:0/20:0-DAG | C16:1/18:0-DAG | C16:1/18:1-DAG | C18:0/18:1-DAG |
|---------------|----------------|----------------|----------------|----------------|----------------|----------------|----------------|----------------|----------------|
| HL-60/neo     | 0.55           | 0.11           | 0.49           | 0.83           | 3.22           | 0.02           | 0.08           | 1.60           | 1.03           |
| HL-60/Bcr-abl | <b>1.53</b>    | <b>0.52</b>    | <b>0.26</b>    | <b>5.95</b>    | <b>8.53</b>    | <b>0.32</b>    | <b>0.25</b>    | <b>0.45</b>    | <b>2.87</b>    |

**B continued DAG species (pmoles/nmole of Pi)**

| Samples       | C18:0/18:2-DAG | C18:0/20:4-DAG | Di-C14:0-DAG | Di-C16:0-DAG | Di-C16:1-DAG | Di-18:0-DAG | Di-18:1-DAG | Total DAG    |
|---------------|----------------|----------------|--------------|--------------|--------------|-------------|-------------|--------------|
| HL-60/neo     | 0.08           | 0.09           | 0.06         | 1.55         | 0.17         | 0.08        | 0.51        | 10.47        |
| HL-60/Bcr-abl | <b>0.17</b>    | <b>0.35</b>    | <b>0.15</b>  | <b>8.59</b>  | <b>0.05</b>  | 0.13        | 0.48        | <b>30.60</b> |

**C****SM species (pmoles/nmole of Pi)**

| <b>Samples</b> | <b>C14-SM</b> | <b>C16-SM</b> | <b>C18-SM</b> | <b>C18:1-SM</b> | <b>C20-SM</b> | <b>C20:1-SM</b> | <b>C22-SM</b> | <b>C22:1-SM</b> | <b>C24-SM</b> | <b>C24:1-SM</b> | <b>Total SM</b> |
|----------------|---------------|---------------|---------------|-----------------|---------------|-----------------|---------------|-----------------|---------------|-----------------|-----------------|
| HL-60/neo      | 0.16          | 69.34         | 1.33          | 0.17            | 0.21          | 0.01            | 2.41          | 0.89            | 2.03          | 23.95           | 100.5           |
| HL-60/Bcr-abl  | <b>0.23</b>   | 59.52         | <b>4.89</b>   | <b>3.69</b>     | <b>1.36</b>   | <b>0.28</b>     | <b>6.72</b>   | <b>3.55</b>     | <b>6.82</b>   | 18.24           | 105.3           |

**Supplementary Table 4. Effect of down-regulation of *BCR-ABL* on lipid levels of HL-60/Bcr-abl cells.** Reported are the levels of individual species of ceramide (**A**), DAG, (**B**), and SM (**C**) from HL-60/Bcr-abl cells after down-regulation of *BCR-ABL*. HL-60/Bcr-abl cells were treated with either *BCR-ABL* targeting siRNA [HL-60/Bcr-abl/Bcr-abl(-)] or scrambled Allstar RNAi control [HL-60/Bcr-abl/SCR] and cells from each condition were collected after 36 hours and lipids were extracted for analysis. Since basal levels of lipids were variable among the different experiments whereas the pattern of changes between experimental conditions was similar (Figure 6A and B), reported are the absolute values of one representative experiment. In bold are the values that were significantly different compared to the time-matched control once the fold change versus the appropriate control was calculated among three independent experiments ( $p < 0.05$  versus HL-60/Bcr-abl/SCR). BDL: below detection limit.

**A Ceramide species (pmoles/nmole of Pi)**

| Samples                  | C14-Cer     | C16-Cer     | C18-Cer     | C18:1-Cer   | C20-Cer | C20:1-Cer   | C22-Cer | C22:1-Cer   | C24-Cer     | C24:1-Cer   | C26-Cer     | C26:1-Cer   | Total Cer   |
|--------------------------|-------------|-------------|-------------|-------------|---------|-------------|---------|-------------|-------------|-------------|-------------|-------------|-------------|
| HL-60/Bcr-abl/SCR        | 0.10        | 0.72        | 0.07        | 0.03        | 0.07    | 0.01        | 0.24    | 0.11        | 2.42        | 2.27        | 0.08        | 0.13        | 6.25        |
| HL-60/Bcr-abl/Bcr-abl(-) | <b>0.15</b> | <b>0.53</b> | <b>0.11</b> | <b>0.07</b> | 0.07    | <b>0.03</b> | 0.18    | <b>0.15</b> | <b>1.12</b> | <b>1.78</b> | <b>0.03</b> | <b>0.06</b> | <b>4.28</b> |

**B DAG species (pmoles/nmole of Pi)**

| Samples                   | C14:0/16:0 DAG | C14:0/18:0 DAG | C14:0/18:1 DAG | C16:0/18:0 DAG | C16:0/18:1 DAG | C16:0/20:0 DAG | C16:1/18:0 DAG | C16:1/18:1 DAG | C18:0/18:1 DAG |
|---------------------------|----------------|----------------|----------------|----------------|----------------|----------------|----------------|----------------|----------------|
| HL-60/Bcr-abl/SCR         | 1.24           | 0.56           | 0.20           | 7.09           | 4.48           | 0.26           | 0.06           | 0.40           | 0.61           |
| HL-60/Bcr-abl/Bcr-abl (-) | <b>0.05</b>    | <b>0.02</b>    | <b>0.01</b>    | <b>0.58</b>    | <b>0.57</b>    | 0.23           | <b>0.48</b>    | 0.50           | <b>0.32</b>    |

**B continued DAG species (pmoles/nmole of Pi)**

| Samples                   | C18:0/18:2-DAG | C18:0/20:4-DAG | Di-C14:0-DAG | Di-C16:0-DAG | Di-C16:1-DAG | Di-C18:0-DAG | Di-C18:1-DAG | Total DAG   |
|---------------------------|----------------|----------------|--------------|--------------|--------------|--------------|--------------|-------------|
| HL-60/Bcr-abl/SCR         | 0.02           | 0.06           | 0.08         | 3.11         | 0.01         | 0.06         | 0.12         | 18.36       |
| HL-60/Bcr-abl/Bcr-abl (-) | 0.03           | <b>0.22</b>    | <b>BDL</b>   | <b>0.09</b>  | <b>BDL</b>   | 0.03         | <b>0.06</b>  | <b>3.19</b> |

**C****SM species (pmoles/nmole of Pi)**

| <b>Samples</b>           | <b>C14-SM</b> | <b>C16-SM</b> | <b>C18-SM</b> | <b>C18:1-SM</b> | <b>C20-SM</b> | <b>C20:1-SM</b> | <b>C22-SM</b> | <b>C22:1-SM</b> | <b>C24-SM</b> | <b>C24:1-SM</b> | <b>C26-SM</b> | <b>C26:1-SM</b> | <b>Total SM</b> |
|--------------------------|---------------|---------------|---------------|-----------------|---------------|-----------------|---------------|-----------------|---------------|-----------------|---------------|-----------------|-----------------|
| HL-60/Bcr-abl/SCR        | 0.72          | 55.52         | 3.56          | 1.27            | 1.16          | 0.33            | 5.87          | 3.28            | 4.97          | 16.00           | 0.01          | 0.33            | 93.02           |
| HL-60/Bcr-abl/Bcr-abl(-) | 0.70          | <b>39.47</b>  | <b>2.92</b>   | 1.15            | <b>0.83</b>   | 0.24            | <b>4.33</b>   | 2.70            | <b>3.25</b>   | <b>12.80</b>    | 0.02          | 0.22            | <b>68.63</b>    |



**Supplementary Table 5. Effect of inhibition of Bcr-abl activity with Imatinib on lipid levels in K562 cells.** Reported are the levels of individual species of ceramide (**A**), DAG (**B**) and SM (**C**) as measured by mass spectrometry during pharmacological inhibition of Bcr-abl in K562 cells with different concentrations of Imatinib (0.4 and 1  $\mu$ M, Im) after 24 and 30 hours of incubation. Since basal levels of lipids were variable among the different experiments whereas the pattern of changes between experimental conditions was similar (Figure 6C and D), reported are the values of one representative experiment. In bold are the values that were significantly different compared to the time-matched control once the fold change versus the appropriate control was calculated among three independent experiments ( $p < 0.05$  versus CT). BDL: below detection limit.

**A Ceramide species (pmoles/nmole of Pi)**

| Samples              | C14-Cer      | C16-Cer | C18-Cer      | C18:1-Cer    | C20-Cer      | C20:1-Cer    | C22-Cer     | C22:1-Cer    | C24-Cer     | C24:1-Cer   | C26-Cer      | C26:1-Cer    | Total Cer   |
|----------------------|--------------|---------|--------------|--------------|--------------|--------------|-------------|--------------|-------------|-------------|--------------|--------------|-------------|
| CT 24h               | 0.051        | 0.56    | 0.038        | 0.02         | 0.043        | 0.004        | 0.19        | 0.062        | 2.63        | 2.18        | 0.049        | 0.111        | 5.94        |
| Im (0.4 $\mu$ M) 24h | <b>0.089</b> | 0.57    | 0.051        | <b>0.087</b> | 0.061        | <b>0.008</b> | <b>0.24</b> | <b>0.107</b> | <b>2.36</b> | 2.83        | <b>0.038</b> | 0.1          | <b>6.54</b> |
| Im (1 $\mu$ M) 24h   | <b>0.107</b> | 0.65    | <b>0.061</b> | <b>0.073</b> | <b>0.071</b> | <b>0.009</b> | <b>0.20</b> | <b>0.102</b> | <b>2.24</b> | <b>2.80</b> | <b>0.033</b> | <b>0.067</b> | 6.41        |
| CT 30h               | 0.068        | 0.99    | 0.031        | 0.026        | 0.053        | 0.003        | 0.26        | 0.080        | 3.15        | 2.73        | 0.058        | 0.115        | 7.56        |
| Im (0.4 $\mu$ M) 30h | <b>0.170</b> | 1.02    | <b>0.109</b> | <b>0.119</b> | <b>0.106</b> | <b>0.017</b> | 0.34        | <b>0.202</b> | 2.85        | <b>3.89</b> | 0.045        | 0.120        | <b>8.99</b> |
| Im (1 $\mu$ M) 30h   | <b>0.181</b> | 0.92    | <b>0.109</b> | <b>0.118</b> | <b>0.089</b> | <b>0.019</b> | 0.27        | <b>0.163</b> | 2.53        | <b>3.75</b> | <b>0.038</b> | 0.092        | 8.28        |

**B DAG species (pmoles/nmole of Pi)**

| Samples              | C14:0/16:0-DAG | C14:0/18:0-DAG | C14:0/18:1-DAG | C16:0/18:0-DAG | C16:0/18:1-DAG | C16:0/20:0-DAG | C16:1/18:0-DAG | C16:1/18:1-DAG |
|----------------------|----------------|----------------|----------------|----------------|----------------|----------------|----------------|----------------|
| CT 24h               | 0.29           | 0.23           | 0.024          | 4.15           | 1.60           | 0.19           | 0.12           | 0.07           |
| Im (0.4 $\mu$ M) 24h | <b>0.03</b>    | <b>0.04</b>    | <b>0.015</b>   | <b>1.49</b>    | <b>0.83</b>    | <b>0.03</b>    | <b>0.03</b>    | <b>0.02</b>    |
| Im (1 $\mu$ M) 24h   | <b>0.02</b>    | <b>0.03</b>    | <b>0.01</b>    | <b>1.14</b>    | <b>0.62</b>    | <b>BDL</b>     | <b>0.02</b>    | <b>0.02</b>    |
| CT 30h               | 0.69           | 0.65           | 0.073          | 10.61          | 3.03           | 0.57           | 0.30           | 0.19           |
| Im (0.4 $\mu$ M) 30h | <b>0.07</b>    | <b>0.20</b>    | <b>0.015</b>   | <b>3.73</b>    | <b>1.12</b>    | <b>0.12</b>    | <b>0.06</b>    | <b>0.05</b>    |
| Im (1 $\mu$ M) 30h   | <b>0.02</b>    | <b>0.06</b>    | <b>0.013</b>   | <b>1.45</b>    | <b>0.97</b>    | <b>0.03</b>    | <b>0.04</b>    | <b>0.03</b>    |

**B continued****DAG species (pmoles/nmole of Pi)**

| Samples        | C18:0/18:1-DAG | C18:0/18:2-DAG | C18:0/20:4-DAG | Di-C14:0-DAG | Di-C16:0-DAG | Di-C18:0-DAG | Di-C18:1-DAG | Total DAG   |
|----------------|----------------|----------------|----------------|--------------|--------------|--------------|--------------|-------------|
| CT 24h         | 0.72           | 0.08           | 0.35           | 0.007        | 1.07         | 0.16         | 0.24         | 9.30        |
| Im (0.4uM) 24h | <b>0.53</b>    | 0.04           | <b>0.84</b>    | <b>0.002</b> | <b>0.21</b>  | 0.08         | <b>0.19</b>  | <b>4.38</b> |
| Im (1uM) 24h   | 0.73           | <b>0.20</b>    | <b>2.01</b>    | <b>0.001</b> | <b>0.10</b>  | 0.13         | 0.26         | <b>5.29</b> |
| CT 30h         | 1.75           | 0.21           | 0.74           | 0.013        | 2.36         | 0.39         | 0.47         | 22.05       |
| Im (0.4uM) 30h | <b>1.09</b>    | <b>0.36</b>    | <b>1.96</b>    | <b>0.003</b> | <b>0.35</b>  | <b>0.23</b>  | <b>0.36</b>  | <b>9.72</b> |
| Im (1uM) 30h   | <b>1.15</b>    | <b>0.45</b>    | <b>3.07</b>    | <b>0.002</b> | <b>0.13</b>  | 0.13         | 0.49         | <b>8.04</b> |

**C****SM species (pmoles/nmole of Pi)**

| Samples        | C14-SM       | C16-SM      | C18-SM      | C18:1-SM    | C20-SM      | C20:1-SM     | C22-SM      | C22:1-SM    | C24-SM      | C24:1-SM    | C26-SM       | C26:1-SM     | Total SM     |
|----------------|--------------|-------------|-------------|-------------|-------------|--------------|-------------|-------------|-------------|-------------|--------------|--------------|--------------|
| CT 24h         | 0.056        | 15.7        | 3.42        | 0.33        | 0.67        | 0.063        | 4.75        | 2.38        | 4.34        | 12.8        | 0.009        | 0.043        | 44.56        |
| Im (0.4uM) 24h | 0.059        | 11.9        | <b>1.95</b> | <b>0.16</b> | <b>0.14</b> | 0.040        | 2.47        | 1.42        | 2.36        | 9.0         | 0.002        | 0.027        | <b>29.53</b> |
| Im (1uM) 24h   | <b>0.075</b> | 14.5        | <b>2.35</b> | <b>0.23</b> | <b>0.17</b> | 0.052        | <b>3.25</b> | 1.90        | <b>3.15</b> | 11.3        | <b>0.001</b> | 0.034        | <b>37.01</b> |
| CT 30h         | 0.074        | 21.5        | 4.18        | 0.39        | 0.80        | 0.071        | 6.02        | 2.85        | 5.47        | 15.9        | 0.012        | 0.055        | 57.32        |
| Im (0.4uM) 30h | <b>0.093</b> | 19.7        | <b>3.04</b> | <b>0.32</b> | <b>0.29</b> | <b>0.067</b> | <b>4.22</b> | <b>2.58</b> | <b>4.07</b> | <b>14.8</b> | <b>0.005</b> | <b>0.047</b> | <b>49.23</b> |
| Im (1uM) 30h   | <b>0.091</b> | <b>19.2</b> | <b>3.00</b> | <b>0.28</b> | <b>0.21</b> | <b>0.060</b> | <b>3.95</b> | <b>2.29</b> | <b>4.13</b> | <b>14.1</b> | <b>0.001</b> | <b>0.043</b> | <b>47.36</b> |
